# Supplementary material for: First principles simulations of MgO(100) surface hydration at ambient conditions
Source: Royal Society of Chemistry journal article supplement (doi:10.1039/d3cp04848a), 2023-12-18
Supplement: d3cp04848a1.pdf [file d3cp04848a1.pdf]

## Supplementary Information For

### First Principles Simulations of MgO (100) Surface Hydration at Ambient Conditions

Michel Sassi<sup>1,\*</sup> and Kevin M. Rosso<sup>1</sup>

<sup>1</sup>Physical and Computational Sciences Directorate, Pacific Northwest National Laboratory,  
Richland, Washington 99352, USA

\*E-mail: [michel.sassi@pnnl.gov](mailto:michel.sassi@pnnl.gov)

#### CONTENT

Figure S1: Bulk structure of Mg(OH)<sub>2</sub>

S2

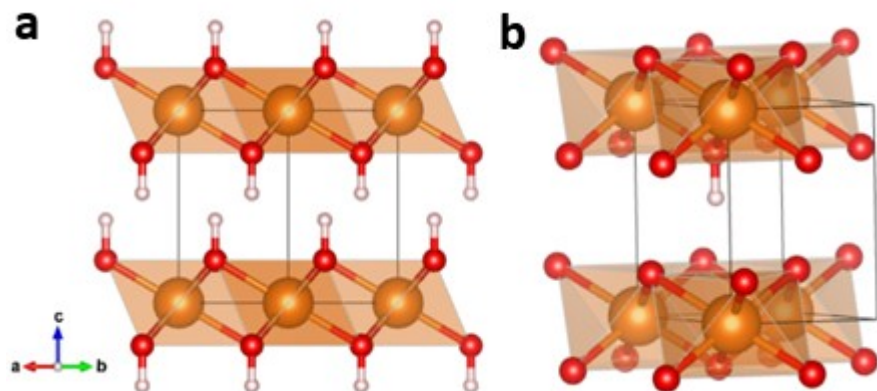

**Figure S1:** (a) Structure of bulk Mg(OH)<sub>2</sub> and (b) representation of the local environment of a OH group. Some atoms have been removed for clarity.
